# Supplementary material for: Effects of Alkali on Water Soluble Hexavalent Chromium in Ordinary Portland Cement
Source: MDPI journal article supplement (doi:10.3390/ijerph19084811), 2022-04-15
Supplement: s1 [file s1]

# Supplementary Figures

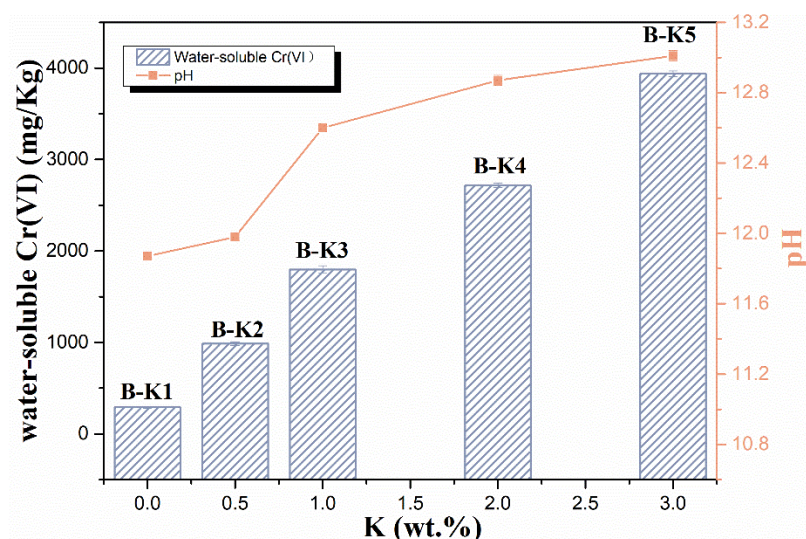

Figure S1. Water-soluble Cr(VI) of samples B-K1–B-K5 and pH in the filtrates of samples B-K1–B-K5.

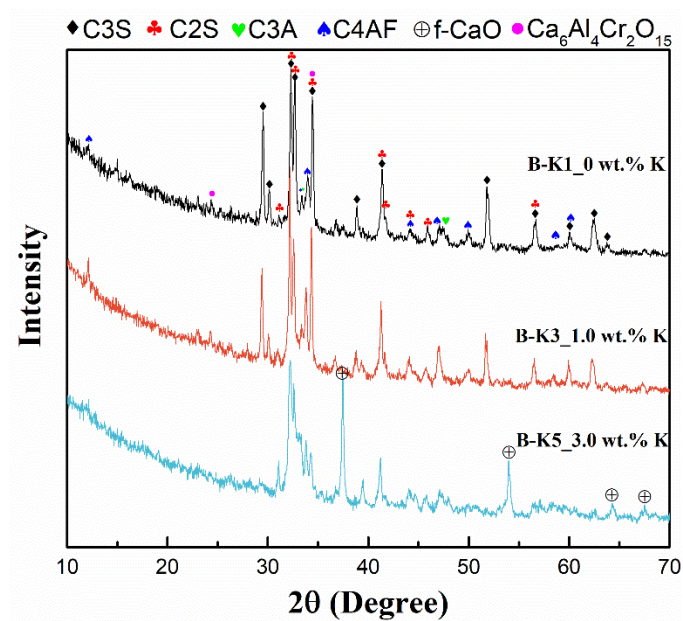

Figure S2. X-ray diffraction patterns of leach residues of samples B-K1, B-K3 and B-K5.

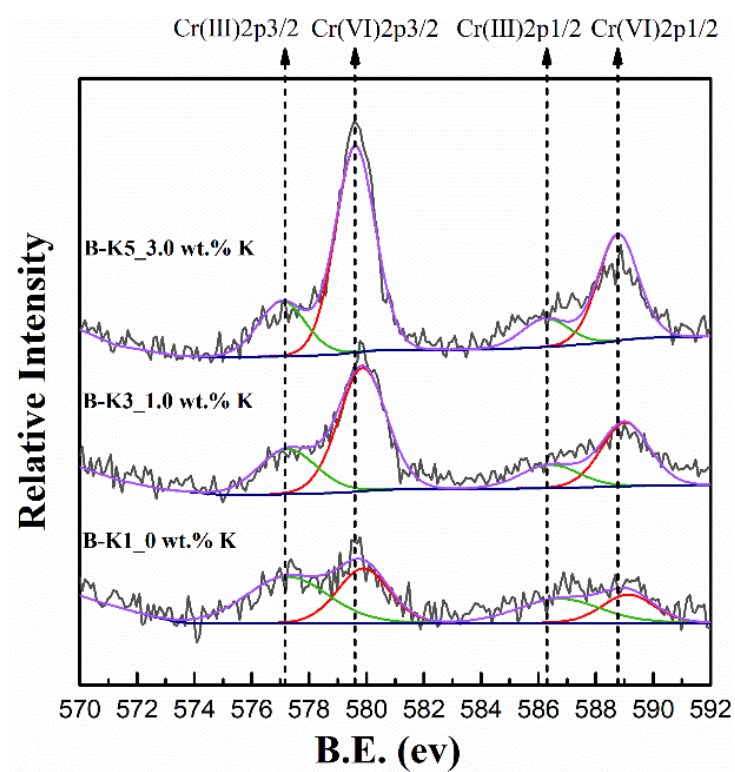

**Figure S3.** XPS spectra of the synthesized samples B-K1, B-K3 and B-K5.
